# Supplementary material
Source: PubMed Central journal article supplement (PMC3519662)
Supplement: fly-6-273-s01.pdf [file fly-6-273-s01.pdf]

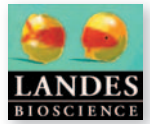

## **Supplemental Material to:**

**Gordon M Bennett, Norma A Pantoja and Patrick M  
O'Grady**

**Diversity and phylogenetic relationships of Wolbachia in  
Drosophila and other native Hawaiian insects**

**Fly 2012; 6 (4)**

**<http://dx.doi.org/10.4161/fly.21161>**

**<http://www.landesbioscience.com/journals/fly/article/21161/>**

1 **SI Table 1.** Annotated list of all *wsp* alleles included in this study. The four-digit barcode  
2 (e.g., 001w) corresponds to terminal taxa included in the Maximum Likelihood phylogeny  
3 produced in RAxML. GenBank accessions are also provided, with the available taxonomy and  
4 collection locality data for each accession. Rows shaded with pink delineate novel Hawaiian  
5 phylotypes generated in this study.

| Barcode | Accession | <i>Wol</i> supergroup | Order       | Family        | Genus             | species                   | Geography                | Pub                    |
|---------|-----------|-----------------------|-------------|---------------|-------------------|---------------------------|--------------------------|------------------------|
| 1w      | DQ412109  | A                     | Diptera     | Drosophilidae | <i>Drosophila</i> | <i>nikannu</i>            | Africa, Ivory Coast      | Mateos et al 2006      |
| 2w      | AF237886  | A                     | Diptera     | Psychodidae   | <i>Lutzomyia</i>  | <i>shannoni</i>           | Columbia                 | Ono et al 2001         |
| 3w      | AY620215  | A                     | Diptera     | Drosophilidae | <i>Drosophila</i> | <i>sturtevanti</i>        | Panama                   | Miller & Riegler 2006  |
| 4w      | AY620216  | A                     | Diptera     | Drosophilidae | <i>Drosophila</i> | <i>sturtevanti</i>        | Panama                   | Miller & Riegler 2006  |
| 5w      | AY620217  | A                     | Diptera     | Drosophilidae | <i>Drosophila</i> | <i>sturtevanti</i>        | Panama                   | Miller & Riegler 2006  |
| 8w      | AB109596  | A                     | Heteroptera | Plataspidae   | <i>Megacopta</i>  | <i>punctatissima</i>      | Japan                    | Kikuchi & Fukatsu 2003 |
| 9w      | AB109602  | A                     | Heteroptera | Plataspidae   | <i>Megacopta</i>  | <i>cribraria</i>          | Japan                    | Kikuchi & Fukatsu 2003 |
| 10w     | AF020067  | A                     | Diptera     | Drosophilidae | <i>Drosophila</i> | <i>simulans</i>           | Coffs Harbour, Australia | Braig et al 1998       |
| 11w     | AY620219  | A                     | Diptera     | Drosophilidae | <i>Drosophila</i> | <i>willistoni</i>         | Belize                   | Miller & Riegler 2006  |
| 12w     | AY291347  | A                     | Diptera     | Drosophilidae | <i>Drosophila</i> | <i>teissieri</i>          | Gabon                    | Charlat et al 2004     |
| 13w     | AY291348  | A                     | Diptera     | Drosophilidae | <i>Drosophila</i> | <i>yakuba</i>             | Cameroon                 | Charlat et al 2004     |
| 14w     | AY620208  | A                     | Diptera     | Drosophilidae | <i>Drosophila</i> | <i>prosaltans</i>         | Panama                   | Miller & Riegler 2006  |
| 15w     | JX134938  | A                     | Diptera     | Drosophilidae | <i>Scaptomyza</i> | <i>flava</i>              | Hawaii                   | This study             |
| 16w     | AY620209  | A                     | Diptera     | Drosophilidae | <i>Drosophila</i> | <i>setptentriosaltans</i> | Panama                   | Miller & Riegler 2006  |
| 17w     | AY620210  | A                     | Diptera     | Drosophilidae | <i>Drosophila</i> | <i>setptentriosaltans</i> | Panama                   | Miller & Riegler 2006  |
| 18w     | AY620211  | A                     | Diptera     | Drosophilidae | <i>Drosophila</i> | <i>setptentriosaltans</i> | Panama                   | Miller & Riegler 2006  |
| 19w     | AY620212  | A                     | Diptera     | Drosophilidae | <i>Drosophila</i> | <i>setptentriosaltans</i> | Panama                   | Miller & Riegler 2006  |
| 20w     | AY620213  | A                     | Diptera     | Drosophilidae | <i>Drosophila</i> | <i>setptentriosaltans</i> | Panama                   | Miller & Riegler 2006  |
| 21w     | AY620214  | A                     | Diptera     | Drosophilidae | <i>Drosophila</i> | <i>setptentriosaltans</i> | Panama                   | Miller & Riegler 2006  |
| 22w     | AY620218  | A                     | Diptera     | Drosophilidae | <i>Drosophila</i> | <i>willistoni</i>         | Veracruz, Mexico         | Miller & Riegler 2006  |
| 23w     | AY620220  | A                     | Diptera     | Drosophilidae | <i>Drosophila</i> | <i>willistoni</i>         | Basse Terre, Guadeloupe  | Miller & Riegler 2006  |
| 24w     | AY620221  | A                     | Diptera     | Drosophilidae | <i>Drosophila</i> | <i>willistoni</i>         | Basse Terre, Guadeloupe  | Miller & Riegler 2006  |
| 25w     | AY620222  | A                     | Diptera     | Drosophilidae | <i>Drosophila</i> | <i>willistoni</i>         | Virgin Islands           | Miller & Riegler 2006  |
| 26w     | AY620223  | A                     | Diptera     | Drosophilidae | <i>Drosophila</i> | <i>willistoni</i>         | Jaton Sacha, Ecuador     | Miller & Riegler 2006  |
| 27w     | AY620224  | A                     | Diptera     | Drosophilidae | <i>Drosophila</i> | <i>willistoni</i>         | Laguna Negra, Uruguay    | Miller & Riegler 2006  |

|     |          |   |             |                  |                         |                     |                          |                         |
|-----|----------|---|-------------|------------------|-------------------------|---------------------|--------------------------|-------------------------|
| 28w | AY620225 | A | Diptera     | Drosophilidae    | <i>Drosophila</i>       | <i>willistoni</i>   | Saint Vincent            | Miller & Riegler 2006   |
| 29w | AY620226 | A | Diptera     | Drosophilidae    | <i>Drosophila</i>       | <i>willistoni</i>   | Panama City, Panama      | Miller & Riegler 2006   |
| 30w | AY620227 | A | Diptera     | Drosophilidae    | <i>Drosophila</i>       | <i>willistoni</i>   | Panama                   | Miller & Riegler 2006   |
| 31w | AY620228 | A | Diptera     | Drosophilidae    | <i>Drosophila</i>       | <i>willistoni</i>   | Belem, Brazil            | Miller & Riegler 2006   |
| 32w | AY620229 | A | Diptera     | Drosophilidae    | <i>Drosophila</i>       | <i>willistoni</i>   | Sao Palo, Brazil         | Miller & Riegler 2006   |
| 33w | DQ412098 | A | Diptera     | Drosophilidae    | <i>Drosophila</i>       | <i>tropicalis</i>   |                          | Mateos et al 2006       |
| 34w | DQ412099 | A | Diptera     | Drosophilidae    | <i>Drosophila</i>       | <i>arawakana</i>    |                          | Mateos et al 2006       |
| 35w | DQ412100 | A | Diptera     | Drosophilidae    | <i>Drosophila</i>       | <i>melanogaster</i> |                          | Mateos et al 2006       |
| 36w | DQ412101 | A | Diptera     | Drosophilidae    | <i>Drosophila</i>       | <i>simulans</i>     |                          | Mateos et al 2006       |
| 37w | DQ412102 | A | Diptera     | Drosophilidae    | <i>Drosophila</i>       | <i>arawakana</i>    |                          | Mateos et al 2006       |
| 38w | DQ412103 | A | Diptera     | Drosophilidae    | <i>Drosophila</i>       | <i>ananassae</i>    |                          | Mateos et al 2006       |
| 39w | DQ412104 | A | Diptera     | Drosophilidae    | <i>Drosophila</i>       | <i>teissieri</i>    |                          | Mateos et al 2006       |
| 40w | DQ412105 | A | Diptera     | Drosophilidae    | <i>Scaptomyza</i>       | <i>pallida</i>      |                          | Mateos et al 2006       |
| 41w | DQ412106 | A | Diptera     | Drosophilidae    | <i>Scaptodrosophila</i> | <i>stonei</i>       |                          | Mateos et al 2006       |
| 42w | JX134930 | A | Diptera     | Drosophilidae    | <i>Drosophila</i>       | <i>nigrocirrus</i>  | Hawaii                   | This study              |
| 43w | JX134939 | A | Diptera     | Drosophilidae    | <i>Scaptomyza</i>       | <i>nr.semiflava</i> | Hawaii                   | This study              |
| 44w | DQ380860 | B | Hymenoptera | Diapriidae       | <i>Diapria</i>          | <i>conica</i>       | Lethbridge, Canada       | Kyei-Poku et al 2006    |
| 45w | DQ380884 | A | Hymenoptera | Encyrtidae       | <i>Tachinaephagus</i>   | <i>zealandicus</i>  | Buenos Aires, Argentina  | Kyei-Poku et al 2006    |
| 46w | DQ380858 | A | Hymenoptera | Braconidae       | <i>Aphaereta</i>        | <i>pallipes</i>     | Ottowa, Canada           | Kyei-Poku et al 2006    |
| 47w | AF418557 |   | Diptera     | Tephritidae      | <i>Rhagoletis</i>       | <i>cerasi</i>       | Europe                   | Reigler & Stauffer 2002 |
| 48w | AF521170 | A | Hymenoptera | Torymidae        | <i>Physothorax</i>      | <i>sp.</i>          |                          | Shoemaker et al 2004    |
| 49w | AF071909 | A | Hymenoptera | Platygastridae   | <i>Amitus</i>           | <i>fuscipennis</i>  |                          | Van meer et al 1999     |
| 50w | DQ380870 | A | Hymenoptera | Pteromalidae     | <i>Spalangia</i>        | <i>cameroni</i>     | Denmark                  | Kyei-Poku et al 2006    |
| 51w | AF071910 | A | Hymenoptera | Diapriidae       | <i>Trichopria</i>       | <i>drosophilae</i>  |                          | van Meer et al 1998     |
| 52w | AF020072 | A | Diptera     | Drosophilidae    | <i>Drosophila</i>       | <i>melanogaster</i> | yw stock                 | Zhou et al 1998         |
| 53w | AF020064 | A | Diptera     | Drosophilidae    | <i>Drosophila</i>       | <i>melanogaster</i> | Cairns                   | Zhou et al 1998         |
| 54w | AF020067 | A | Diptera     | Drosophilidae    | <i>Drosophila</i>       | <i>simulans</i>     | Coffs Harbour, Australia | Zhou et al 1998         |
| 55w | AF020063 | A | Diptera     | Drosophilidae    | <i>Drosophila</i>       | <i>melanogaster</i> | Aubiry stock             | Zhou et al 1998         |
| 56w | AB109621 | A | Heteroptera | Acanthosomatidae | <i>Elasmucha</i>        | <i>signoreti</i>    | Japan                    | Kikuchi & Fukatsu 2003  |
| 57w | DQ380874 | B | Hymenoptera | Pteromalidae     | <i>Spalangia</i>        | <i>cameroni</i>     |                          | Kyei-Poku et al 2006    |
| 58w | JX134923 | A | Diptera     | Drosophilidae    | <i>Scaptomyza</i>       | <i>longisetosa</i>  | Hawaii                   | This study              |
| 59w | AB109604 | B | Heteroptera | Pentatomidae     | <i>Agonoscelis</i>      | <i>femoralis</i>    | Japan                    | Kikuchi & Fukatsu 2003  |

|     |          |   |             |                  |                      |                               |               |                        |
|-----|----------|---|-------------|------------------|----------------------|-------------------------------|---------------|------------------------|
| 60w | AB109606 | B | Heteroptera | Acanthosomatidae | <i>Sastragala</i>    | <i>esakii</i>                 | Japan         | Kikuchi & Fukatsu 2003 |
| 61w | AB109618 | B | Heteroptera | Lygaeidae        | <i>Spilostethus</i>  | <i>hospes</i>                 | Japan         | Kikuchi & Fukatsu 2003 |
| 62w | AB109622 | B | Heteroptera | Tingidae         | <i>Stephanitis</i>   | <i>pyrioides</i>              | Japan         | Kikuchi & Fukatsu 2003 |
| 63w | AB109623 | B | Heteroptera | Lygaeidae        | <i>Paraucosmetus</i> | <i>pallicornis</i>            | Japan         | Kikuchi & Fukatsu 2003 |
| 64w | AF020068 | A | Diptera     | Drosophilidae    | <i>Drosophila</i>    | <i>simulans</i>               | Hawaii Strain | Braig et al 1998       |
| 65w | AB109624 | B | Heteroptera | Lygaeidae        | Paraucosmetu<br>s    | <i>pallicornis</i>            | Japan         | Kikuchi & Fukatsu 2003 |
| 66w | AF020073 | A | Diptera     | Drosophilidae    | <i>Drosophila</i>    | <i>sechellia</i>              |               | Zhou et al 1999        |
| 67w | AF020075 | A | Lepidoptera | Pyralidae        | <i>Caudra</i>        | <i>cautella</i>               |               | Braig et al 1998       |
| 68w | AF020070 | A | Diptera     | Drosophilidae    | <i>Drosophila</i>    | <i>simulans</i>               | Riverside, CA | Braig et al 1998       |
| 69w | AF020062 | A | Diptera     | Drosophilidae    | <i>Drosophila</i>    | <i>auraria</i>                |               | Zhou et al 1998        |
| 70w | JX134952 | A | Diptera     | Drosophilidae    | <i>Drosophila</i>    | <i>suzukii</i>                | Hawaii        | This study             |
| 71w | JX134953 | A | Diptera     | Drosophilidae    | <i>Drosophila</i>    | <i>suzukii</i>                | Hawaii        | This study             |
| 72w | JX134954 | A | Diptera     | Drosophilidae    | <i>Drosophila</i>    | <i>suzukii</i>                | Hawaii        | This study             |
| 73w | DQ380859 | A | Hymenoptera | Chalcidoidea     | <i>Brachymeria</i>   | <i>podagrica</i>              |               | Kyei-Poku et al 2006   |
| 74w | DQ412095 | A | Diptera     | Drosophilidae    | <i>Drosophila</i>    | <i>ananassae</i>              |               | Mateos et al 2006      |
| 75w | DQ412096 | A | Diptera     | Drosophilidae    | <i>Drosophila</i>    | <i>ananassae</i>              |               | Mateos et al 2006      |
| 76w | AB109600 | A | Heteroptera | Plataspidae      | <i>Coptosoma</i>     | <i>parvipictum</i>            | Japan         | Kikuchi & Fukatsu 2003 |
| 77w | AB109601 | A | Heteroptera | Plataspidae      | Megacocta            | <i>cribraria</i>              | Japan         | Kikuchi & Fukatsu 2003 |
| 78w | AB094391 | A | Lepidoptera | Nymphalidae      | <i>Mycalesis</i>     | <i>francisca</i>              | Japan         | Tagami & Miura 2002    |
| 79w | AB038333 | B | Coleoptera  | Bruchidae        | Callosobruchus       | <i>chinensis</i>              | Japan         | Kondo et al 2002       |
| 80w | AB056664 | B | Lepidoptera | Crambidae        | <i>Ostrinia</i>      | <i>furnacalis</i>             | Japan         | Kageyama et al 2002    |
| 81w | JX134934 | B | Diptera     | Drosophilidae    | <i>Drosophila</i>    | <i>sp.1nr.basimacul<br/>a</i> | Hawaii        | This study             |
| 82w | JX134933 | B | Diptera     | Drosophilidae    | <i>Drosophila</i>    | <i>sp.2nr.basimacul<br/>a</i> | Hawaii        | This study             |
| 83w | JX134932 | B | Diptera     | Drosophilidae    | <i>Drosophila</i>    | <i>redunca</i>                | Hawaii        | This study             |
| 84w | JX134931 | B | Diptera     | Drosophilidae    | <i>Drosophila</i>    | <i>prodita</i>                | Hawaii        | This study             |
| 85w | JX134910 | B | Diptera     | Drosophilidae    | <i>Drosophila</i>    | <i>dasyncnemias</i>           | Hawaii        | This study             |
| 86w | JX134929 | B | Diptera     | Drosophilidae    | <i>Drosophila</i>    | <i>fundita</i>                | Hawaii        | This study             |
| 87w | JX134925 | B | Diptera     | Drosophilidae    | <i>Drosophila</i>    | <i>ancyla</i>                 | Hawaii        | This study             |
| 88w | AB109573 | A | Heteroptera | Coreridae        | <i>Dasynus</i>       | <i>coccocinctus</i>           | Japan         | Kikuchi & Fukatsu 2003 |
| 89w | AB109575 | A | Heteroptera | Lygaeidae        | <i>Pachygrontha</i>  | <i>antennata</i>              | Japan         | Kikuchi & Fukatsu 2003 |
| 90w | AB109568 | A | Heteroptera | Berytidae        | <i>Yemma</i>         | <i>exilis</i>                 | Japan         | Kikuchi & Fukatsu 2003 |
| 91w | AB109579 | B | Heteroptera | Lygaeidae        | Togo                 | <i>hemipterus</i>             | Japan         | Kikuchi & Fukatsu 2003 |

|      |          |   |             |                  |                        |                         |                    |                          |
|------|----------|---|-------------|------------------|------------------------|-------------------------|--------------------|--------------------------|
| 92w  | AB109605 | A | Heteroptera | Acanthosomatidae | <i>Elasmotethus</i>    | <i>brevis</i>           | Japan              | Kikuchi & Fukatsu 2003   |
| 93w  | AF020079 | A | Diptera     | Hippoboscoidea   | <i>Glossina</i>        | <i>centralis</i>        |                    | Zhou et al 1998          |
| 94w  | AF020081 | A | Hymenoptera | Pteromalidae     | <i>Nasonia</i>         | <i>vitripennis</i>      |                    | Zhou et al 1998          |
| 95w  | AF217714 | A | Diptera     | Muscidae         | <i>Haemotobia</i>      | <i>irritans</i>         |                    | Jeyaprakash & Hoy 2000   |
| 96w  | AF289669 | A | Diptera     | Pteromalidae     | <i>Spalangia</i>       | <i>nigroaenae</i>       | Kasahastan         | Giladi et al (Kyei-poku) |
| 97w  | AY622511 |   | Diptera     | Calliphoridae    | <i>Protocalliphora</i> | <i>sialia</i>           |                    | Bordenstain & Wenegreen  |
| 98w  | AY095153 | A | Hymenoptera | Cynipidae        | <i>Andricus</i>        | <i>solitarius</i>       | France             | Rokas et al 2002         |
| 99w  | AY095154 | A | Hymenoptera | Cynipidae        | <i>Synergus</i>        | <i>crassicornis</i>     | Span               | Rokas et al 2002         |
| 100w | DQ380856 | A | Diptera     | Muscidae         | <i>Haematobia</i>      | <i>irritans</i>         | Lethbridge, Canada | Kyei-Poku etal 2008      |
| 101w | DQ380867 | A | Diptera     | Calliphoridae    | <i>Protocalliphora</i> | <i>sialia</i>           | Lethbridge, Canada | Kyei-Poku etal 2008      |
| 102w | DQ380868 | A | Diptera     | Sarcophagidae    | <i>Ravinia</i>         | <i>querula</i>          | Lethbridge, Canada | Kyei-Poku etal 2008      |
| 103w | DQ380879 | A | Hymenoptera | Pteromalidae     | <i>Spalangia</i>       | <i>slovaca</i>          | Kazakhstan         | Kyei-Poku etal 2008      |
| 104w | DQ380880 | A | Hymenoptera | Pteromalidae     | <i>Spalangia</i>       | <i>slovaca</i>          | Russia             | Kyei-Poku etal 2008      |
| 105w | DQ380883 | A | Hymenoptera | Pteromalidae     | <i>Trichomalopsis</i>  | <i>sarcophagae</i>      | Lethbridge, Canada | Kyei-Poku etal 2008      |
| 106w | DQ412093 | A | Diptera     | Drosophilidae    | <i>Drosophila</i>      | <i>pseudotakahashii</i> |                    | Mateos et al 2006        |
| 107w | DQ412094 | A | Diptera     | Drosophilidae    | <i>Drosophila</i>      | <i>takahashii</i>       |                    | Mateos et al 2006        |
| 108w | AB094375 | B | Lepidoptera | Noctuidae        | <i>Mamestra</i>        | <i>brassicae</i>        | Japan              | Tagami & Miura 2004      |
| 109w | AB094376 | B | Lepidoptera | Lyncaenidae      | <i>Zizeeria</i>        | <i>maha agria</i>       | Japan              | Tagami & Miura 2004      |
| 110w | AB094382 | B | Lepidoptera | Nymphalidae      | <i>Hypolimnas</i>      | <i>bolina</i>           | Japan              | Tagami & Miura 2004      |
| 111w | AB094383 | B | Lepidoptera | Nymphalidae      | <i>Ideopsis</i>        | <i>similis similis</i>  | Japan              | Tagami & Miura 2004      |
| 112w | AB094384 | B | Lepidoptera | Nymphalidae      | <i>Junonia</i>         | <i>almana almana</i>    | Japan              | Tagami & Miura 2004      |
| 113w | AB094389 | B | Lepidoptera | Nymphalidae      | <i>Ypthima</i>         | <i>argus</i>            | Japan              | Tagami & Miura 2004      |
| 114w | AB094390 | B | Lepidoptera | Lyncaenidae      | <i>Everes</i>          | <i>argiades</i>         | Japan              | Tagami & Miura 2004      |
| 115w | AB094394 | B | Lepidoptera | Pieridae         | <i>Eurema</i>          | <i>hecabe</i>           | Japan              | Tagami & Miura 2004      |
| 116w | AB094394 | B | Lepidoptera | Pieridae         | <i>Eurema</i>          | <i>hecabe</i>           | Japan              | Tagami & Miura 2004      |
| 117w | AF020074 | B | Diptera     | Drosophilidae    | <i>Drosophila</i>      | <i>simulans</i>         | Noumea strain      | Zhou et al 1998          |
| 118w | AF020061 | B | Diptera     | Culicidae        | <i>Culex</i>           | <i>pipens</i>           | ESPRO Strain       | Zhou et al 1998          |
| 119w | AJ271196 | B | Lepidoptera | Nymphalidae      | <i>Acraea</i>          | <i>alcinoe</i>          | Uganda, Africa     | Jiggins et al 2000       |
| 120w | AJ271197 | B | Lepidoptera | Nymphalidae      | <i>Acraea</i>          | <i>althoffi</i>         | Uganda, Africa     | Jiggins et al 2000       |
| 121w | AJ271198 | B | Lepidoptera | Nymphalidae      | <i>Acraea</i>          | <i>encedon</i>          | Africa             | Jiggins et al 2000       |
| 122w | AJ307076 | B | Lepidoptera | Nymphalidae      | <i>Acraea</i>          | <i>encedon</i>          | Tanzania           | Dyson et al 2002         |
| 123w | DQ412107 | B | Diptera     | Drosophilidae    | <i>Drosophila</i>      | <i>mauritiana</i>       |                    | Mateos et al 2006        |
| 124w | DQ412108 | B | Diptera     | Drosophilidae    | <i>Drosophila</i>      | <i>pseudoananassae</i>  |                    | Mateos et al 2006        |

|      |          |   |             |               |                       |                           |                    |                           |
|------|----------|---|-------------|---------------|-----------------------|---------------------------|--------------------|---------------------------|
| 125w | AF295350 | A | Diptera     | Tephritidae   | <i>Bactocera</i>      | <i>dorsalis</i>           |                    | Jamnongluck               |
| 126w | AY331121 | B | Anoplura    | Polyplacidae  | <i>Polyplax</i>       | <i>serrata</i>            | Canada             | Kyei-Poku et al 2004      |
| 127w | DQ380862 | B | Hymenoptera | Encyrtidae    | <i>Kleidotoma</i>     | <i>sp.</i>                | Lethbridge, Canada | Kyei-Poku et al 2008      |
| 128w | DQ380861 | B | Hymenoptera | Chalcididae   | <i>Dirhinus</i>       | <i>himalayanus</i>        | Morocco, Spain     | Kyei-Poku et al 2008      |
| 129w | AB094385 | B | Lepidoptera | Nymphalidae   | <i>Junonia</i>        | <i>orithya</i>            | Japan              | Tagami & Miura 2004       |
| 130w | AB038327 | B | Coleoptera  | Bruchidae     | <i>Callosobruchus</i> | <i>chinensis</i>          | Japan              | Kondo et al 2002          |
| 131w | AB094202 | B | Hymenoptera | Braconidae    | <i>Cotesia</i>        | <i>glomerata</i>          | Japan              | Tagami & Miura 2002 unpub |
| 132w | AF472564 | B | Hymenoptera | Formicidae    | <i>Acromyrmex</i>     | <i>echinatio</i>          | Panama             | Van Brom et al 2003       |
| 133w | AJ271194 | B | Lepidoptera | Nymphalidae   | <i>Acraea</i>         | <i>eponina</i>            | Africa             | Jiggins et al 2000        |
| 134w | AJ291379 | B | Hemiptera   | Aleyroididae  | <i>Bemisia</i>        | <i>tabaci</i>             |                    | Nirigianaki et al 2003    |
| 135w | JX134911 | B | Diptera     | Drosophilidae | <i>Drosophila</i>     | <i>dasycnemia</i>         | Hawaii             | This study                |
| 136w | JX134912 | B | Diptera     | Drosophilidae | <i>Drosophila</i>     | <i>dasycnemia</i>         | Hawaii             | This study                |
| 137w | JX134913 | B | Diptera     | Drosophilidae | <i>Drosophila</i>     | <i>dasycnemia</i>         | Hawaii             | This study                |
| 138w | JX134914 | B | Diptera     | Drosophilidae | <i>Drosophila</i>     | <i>dasycnemia</i>         | Hawaii             | This study                |
| 139w | JX134921 | B | Diptera     | Drosophilidae | <i>Drosophila</i>     | <i>dasycnemia</i>         | Hawaii             | This study                |
| 140w | JX134916 | B | Diptera     | Drosophilidae | <i>Drosophila</i>     | <i>dasycnemia</i>         | Hawaii             | This study                |
| 141w | JX134920 | B | Diptera     | Drosophilidae | <i>Drosophila</i>     | <i>dasycnemia</i>         | Hawaii             | This study                |
| 142w | JX134927 | B | Diptera     | Drosophilidae | <i>Drosophila</i>     | <i>eurypeza</i>           | Hawaii             | This study                |
| 143w | JX134949 | B | Hemiptera   | Cicadellidae  | <i>Nesophrosyne</i>   | <i>n.sp.9</i>             | Hawaii             | This study                |
| 144w | AB094372 | B | Lepidoptera | Pieridae      | <i>Pieris</i>         | <i>rapae</i>              | Japan              | Tagami & Miura 2004       |
| 145w | AB094373 | B | Lepidoptera | Pieridae      | <i>Pieris</i>         | <i>rapae</i>              | Japan              | Tagami & Miura 2004       |
| 146w | AB094374 | B | Lepidoptera | Pieridae      | <i>Pieris</i>         | <i>rapae</i>              | Japan              | Tagami & Miura 2004       |
| 147w | AB094377 | B | Lepidoptera | Lyncnaenidae  | <i>Lycaena</i>        | <i>phlaeas daimio</i>     | Japan              | Tagami & Miura 2004       |
| 148w | AB094378 | B | Lepidoptera | Nymphalidae   | <i>Polygonia</i>      | <i>c-aureum</i>           | Japan              | Tagami & Miura 2004       |
| 149w | JX134928 | B | Diptera     | Drosophilidae | <i>Drosophila</i>     | <i>forficata</i>          | Hawaii             | This study                |
| 150w | JX134935 | B | Diptera     | Drosophilidae | <i>Drosophila</i>     | <i>nr.dorsigera</i>       | Hawaii             | This study                |
| 151w | JX134951 | B | Hemiptera   | Cicadellidae  | <i>Nesophrosyne</i>   | <i>craterigena</i>        | Hawaii             | This study                |
| 152w | JX134941 | B | Hemiptera   | Cicadellidae  | <i>Nesophrosyne</i>   | <i>craterigena</i>        | Hawaii             | This study                |
| 153w | JX134940 | B | Hemiptera   | Cicadellidae  | <i>Nesophrosyne</i>   | <i>craterigena</i>        | Hawaii             | This study                |
| 154w | JX134942 | B | Hemiptera   | Cicadellidae  | <i>Nesophrosyne</i>   | <i>craterigena</i>        | Hawaii             | This study                |
| 155w | JX134943 | B | Hemiptera   | Cicadellidae  | <i>Nesophrosyne</i>   | <i>craterigena</i>        | Hawaii             | This study                |
| 156w | AB094379 | B | Lepidoptera | Pieridae      | <i>Colias</i>         | <i>erate poliographus</i> | Japan              | Tagami & Miura 2004       |
| 157w | AB094380 | B | Lepidoptera | Lasiocampidae | <i>Dendrolimus</i>    | <i>spectabilis</i>        | Japan              | Tagami & Miura 2004       |

|      |          |   |             |               |                         |                         |       |                          |
|------|----------|---|-------------|---------------|-------------------------|-------------------------|-------|--------------------------|
| 158w | AB094381 | B | Lepidoptera | Noctulidae    | <i>Sacopolia</i>        | <i>illoba</i>           | Japan | Tagami & Miura 2004      |
| 159w | AB094386 | B | Lepidoptera | Lyncaenidae   | <i>Ussuriana</i>        | <i>stygiana</i>         | Japan | Tagami & Miura 2004      |
| 160w | AB094387 | B | Lepidoptera | Hesperlidae   | <i>Leptalina</i>        | <i>unicolor</i>         | Japan | Tagami & Miura 2004      |
| 161w | AB094388 | B | Lepidoptera | Nymphalidae   | <i>Libythea</i>         | <i>celti</i>            | Japan | Tagami & Miura 2004      |
| 162w | AB094396 | B | Lepidoptera | Pieridae      | <i>Eurema</i>           | <i>hecabe</i>           | Japan | Hiroki et al 2004        |
| 163w | AB096231 | B | Acari       | Tetranychidae | <i>Panonychus</i>       | <i>mori</i>             | Japan | Xie et al 2011           |
| 164w | AB096235 | B | Acari       | Tetranychidae | <i>Schizotetranychu</i> | <i>cercidiphylli</i>    | Japan | Gotoh et al 2009 (unpub) |
| 165w | AB109566 | B | Heteroptera | Lygaeidae     | <i>Nysius</i>           | <i>plebeius</i>         | Japan | Kikuchi & Fukatsu 2003   |
| 166w | AB109567 | B | Heteroptera | Lygaeidae     | <i>Nysius</i>           | <i>plebeius</i>         | Japan | Kikuchi & Fukatsu 2003   |
| 167w | AB109570 | B | Heteroptera | Coreidae      | <i>Cletus</i>           | <i>rusticus</i>         | Japan | Kikuchi & Fukatsu 2003   |
| 168w | AB109571 | B | Heteroptera | Alydidae      | <i>Riptortus</i>        | <i>clavatus</i>         | Japan | Kikuchi & Fukatsu 2003   |
| 169w | AB109572 | B | Heteroptera | Coreidae      | <i>Homoeocerus</i>      | <i>unipunctatus</i>     | Japan | Kikuchi & Fukatsu 2003   |
| 170w | AB109576 | B | Heteroptera | Coreidae      | <i>Cletus</i>           | <i>trigonus</i>         | Japan | Kikuchi & Fukatsu 2003   |
| 171w | AB109577 | B | Heteroptera | Coreidae      | <i>Acanthocoris</i>     | <i>sordidus</i>         | Japan | Kikuchi & Fukatsu 2003   |
| 172w | AB109578 | A | Heteroptera | Lygaeidae     | Togo                    | <i>hemipterus</i>       | Japan | Kikuchi & Fukatsu 2003   |
| 173w | AB109581 | B | Heteroptera | Lygaeidae     | <i>Horridipamera</i>    | <i>nietner</i>          | Japan | Kikuchi & Fukatsu 2003   |
| 174w | AB109582 | B | Heteroptera | Lygaeidae     | Pylorgus                | <i>colon</i>            | Japan | Kikuchi & Fukatsu 2003   |
| 175w | AB109584 | B | Heteroptera | Lygaeidae     | <i>Lethaeus</i>         | <i>assamensis</i>       | Japan | Kikuchi & Fukatsu 2003   |
| 176w | AB109585 | B | Heteroptera | Lygaeidae     | Piocoris                | <i>varius</i>           | Japan | Kikuchi & Fukatsu 2003   |
| 177w | AB109586 | B | Heteroptera | Lygaeidae     | Piocoris                | <i>varius</i>           | Japan | Kikuchi & Fukatsu 2003   |
| 178w | AB109587 | B | Heteroptera | Coreidae      | <i>Hygia</i>            | <i>lativentris</i>      | Japan | Kikuchi & Fukatsu 2003   |
| 179w | AB109588 | B | Heteroptera | Lygaeidae     | <i>Horridipamera</i>    | <i>inconspicua</i>      | Japan | Kikuchi & Fukatsu 2003   |
| 180w | AB109589 | B | Heteroptera | Coreidae      | <i>Hygia</i>            | <i>opaca</i>            | Japan | Kikuchi & Fukatsu 2003   |
| 181w | AB109590 | B | Heteroptera | Rhopalidae    | <i>Rhopalus</i>         | <i>maculatus</i>        | Japan | Kikuchi & Fukatsu 2003   |
| 182w | AB109591 | B | Heteroptera | Rhopalidae    | <i>Stictopleurus</i>    | <i>punctatonervosus</i> | Japan | Kikuchi & Fukatsu 2003   |
| 183w | AB109593 | B | Heteroptera | Coreidae      | <i>Cletus</i>           | <i>punctiger</i>        | Japan | Kikuchi & Fukatsu 2003   |
| 184w | AB109595 | A | Heteroptera | Pentatomidae  | Scotinophara            | <i>lurida</i>           | Japan | Kikuchi & Fukatsu 2003   |
| 185w | AB109597 | B | Heteroptera | Plataspidae   | Megacocta               | <i>punctatissima</i>    | Japan | Kikuchi & Fukatsu 2003   |
| 186w | AB109599 | B | Heteroptera | Pentatomidae  | <i>Eysarcoris</i>       | <i>annamita</i>         | Japan | Kikuchi & Fukatsu 2003   |
| 187w | AB109603 | B | Heteroptera | Plataspidae   | <i>Brachyplatys</i>     | <i>subaeneus</i>        | Japan | Kikuchi & Fukatsu 2003   |
| 188w | AB109607 | B | Heteroptera | Nabidae       | Nabis                   | <i>stenoferus</i>       | Japan | Kikuchi & Fukatsu 2003   |
| 189w | AB109608 | B | Heteroptera | Nabidae       | Nabis                   | <i>stenoferus</i>       | Japan | Kikuchi & Fukatsu 2003   |
| 190w | AB109609 | B | Heteroptera | Pentatomidae  | <i>Eurydema</i>         | <i>dominulus</i>        | Japan | Kikuchi & Fukatsu 2003   |



|      |          |   |             |                   |                      |                      |                 |                        |
|------|----------|---|-------------|-------------------|----------------------|----------------------|-----------------|------------------------|
| 191w | AB109610 | B | Heteroptera | Lygaeidae         | <i>Geocoris</i>      | <i>proteus</i>       | Japan           | Kikuchi & Fukatsu 2003 |
| 192w | AB109611 | B | Heteroptera | Miridae           | <i>Charagochilus</i> | <i>angusticollis</i> | Japan           | Kikuchi & Fukatsu 2003 |
| 193w | AB109613 | B | Heteroptera | Miridae           | <i>Charagochilus</i> | <i>angusticollis</i> | Japan           | Kikuchi & Fukatsu 2003 |
| 194w | AB109614 | B | Heteroptera | Acanthosomatidae  | <i>Elasmucha</i>     | <i>putoni</i>        | Japan           | Kikuchi & Fukatsu 2003 |
| 195w | AB109615 | B | Heteroptera | Tingidae          | <i>Galeatus</i>      | <i>spinifrons</i>    | Japan           | Kikuchi & Fukatsu 2003 |
| 196w | AB109616 | B | Heteroptera | Miridae           | <i>Apolygus</i>      | <i>lucorum</i>       | Japan           | Kikuchi & Fukatsu 2003 |
| 197w | AB109617 | B | Heteroptera | Lygaeidae         | <i>Spilostethus</i>  | <i>hospes</i>        | Japan           | Kikuchi & Fukatsu 2003 |
| 198w | AB109619 | B | Heteroptera | Acanthosomatidae  | <i>Elasmucha</i>     | <i>amurensis</i>     | Japan           | un pub                 |
| 199w | JX134937 | B | Diptera     | Calliphoridae     | <i>Dyscritomyia</i>  | <i>obscura</i>       | Hawaii          | This study             |
| 200w | JX134924 | B | Diptera     | Drosophilidae     | <i>Drosophila</i>    | <i>nr.fundita</i>    | Hawaii          | This study             |
| 201w | JX134918 | B | Diptera     | Drosophilidae     | <i>Drosophila</i>    | <i>dasyncnemias</i>  | Hawaii          | This study             |
| 202w | JX134917 | B | Diptera     | Drosophilidae     | <i>Drosophila</i>    | <i>dasyncnemias</i>  | Hawaii          | This study             |
| 203w | AB109620 | B | Heteroptera | Pyrrhocoridae     | <i>Pyrrhocoris</i>   | <i>sinuaticollis</i> | Japan           | Kikuchi & Fukatsu 2003 |
| 204w | AF020076 | B | Lepidoptera | Pyralidae         | <i>Caudra</i>        | <i>cautella</i>      |                 | Zhou et al 1998        |
| 205w | AF020077 | A | Diptera     | Hippoboscoidea    | <i>Glossina</i>      | <i>austeni</i>       | Africa?         | Zhou et al 1998        |
| 206w | AF020080 | B | Hemiptera   | Delphacidae       | <i>Laodelphax</i>    | <i>stratellus</i>    | Yunnan Province | Zhou et al 1998        |
| 207w | AF020082 | A | Diptera     | Psychodidae       | <i>Phlebotomus</i>   | <i>papatasi</i>      | Isreal Strain   | Zhou et al 1998        |
| 208w | AF020083 | B | Coleoptera  | Tenebrionidae     | <i>Tribolium</i>     | <i>confusum</i>      |                 | Zhou et al 1998        |
| 209w | AF020084 | B | Hymenoptera | Trichogrammatidae | <i>Trichogramma</i>  | <i>deion</i>         | Texas           | Zhou et al 1998        |
| 210w | AF020085 | B | Hemiptera   | Delphacidae       | <i>Tagosedes</i>     | <i>orizicolus</i>    | Costa Rica      | Zhou et al 1998        |
| 211w | AF217725 | B | Odonata     | Libellulidae      | <i>Perithemis</i>    | <i>tenera</i>        |                 | Jeyaprakash & Hoy 2000 |
| 212w | AF071915 | B | Hymenoptera | Torymidae         | <i>Torymus</i>       | <i>bedeguaris</i>    | Netherlands     | Van Meer et al 1999    |
| 213w | AF071921 | B | Hymenoptera | Pteromalidae      | <i>Spalangia</i>     | <i>fuscipes</i>      | Leiden Uni.     | Van Meer et al 1999    |
| 214w | AF071922 | B | Hymenoptera | Cynipidae         | <i>Diplolepis</i>    | <i>rosae</i>         | Netherlands     | Van Meer et al 1999    |
| 215w | AF071924 | B | Hymenoptera | Trichogrammatidae | <i>Trichogramma</i>  | <i>kayaki</i>        | Riverside, CA   | Van Meer et al 1999    |
| 216w | AJ130716 | B | Lepidoptera | Nymphalidae       | <i>Acraea</i>        | <i>encedon</i>       | Africa          | Schulenberg et al 200  |
| 217w | DQ380876 | B | Hymenoptera | Pteromalidae      | <i>Spalangia</i>     | <i>endius</i>        | Peru            | Keyei-Poku et al 2008  |
| 218w | DQ380877 | B | Hymenoptera | Pteromalidae      | <i>Spalangia</i>     | <i>endius</i>        | Florida, USA    | Keyei-Poku et al 2008  |
| 219w | DQ380881 | B | Hymenoptera | Diapriidae        | <i>Trichopria</i>    | <i>nigra</i>         | Kazakhstan      | Keyei-Poku et al 2008  |
| 220w | DQ380882 | B | Hymenoptera | Diapriidae        | <i>Trichopria</i>    | <i>nigra</i>         | Russia          | Keyei-Poku et al 2008  |
| 221w | AF288984 | B | Hymenoptera | Pteromalidae      | <i>Spalangia</i>     | <i>cameroni</i>      | Brazil          | Giladi et al 2000      |
| 222w | AF288985 | B | Hymenoptera | Pteromalidae      | <i>Spalangia</i>     | <i>cameroni</i>      |                 | Giladi et al 2000      |
| 223w | DQ380870 | B | Hymenoptera | Pteromalidae      | <i>Spalangia</i>     | <i>cameroni</i>      | Denmark         | Keyei-Poku et al 2008  |
| 224w | DQ380873 | B | Hymenoptera | Pteromalidae      | <i>Spalangia</i>     | <i>cameroni</i>      | France          | Keyei-Poku et al 2008  |

|      |          |   |             |                   |                      |                      |                |                               |
|------|----------|---|-------------|-------------------|----------------------|----------------------|----------------|-------------------------------|
| 225w | AB024569 | A | Lepidoptera | Pyralidae         | <i>Ephestia</i>      | <i>kuehniella</i>    | Yokohama       | Sasaki 1999                   |
| 226w | AB024570 | A | Lepidoptera | Pyralidae         | <i>Ephestia</i>      | <i>kuehniella</i>    | Tsuchiura      | Sasaki 1999                   |
| 227w | AF289668 | A | Hymenoptera | Pteromalidae      | <i>Spalangia</i>     | <i>cameroni</i>      | Isreal         | Giladi et al 2000 unpub       |
| 228w | AF289670 | A | Hymenoptera | Pteromalidae      | <i>Spalangia</i>     | <i>cameroni</i>      | Russia         | Giladi et al 2000 unpub       |
| 229w | AF288979 | A | Hymenoptera | Pteromalidae      | <i>Spalangia</i>     | <i>cameroni</i>      | Yachini        | Giladi et al 2000 unpub       |
| 230w | AF288980 | A | Hymenoptera | Pteromalidae      | <i>Spalangia</i>     | <i>cameroni</i>      | Tseelim        | Giladi et al 2000 unpub       |
| 231w | AF288981 | A | Hymenoptera | Pteromalidae      | <i>Spalangia</i>     | <i>cameroni</i>      | Isreal         | Giladi et al 2000 unpub       |
| 232w | AF288986 | A | Hymenoptera | Pteromalidae      | <i>Spalangia</i>     | <i>cameroni</i>      | New York 1983  | Giladi et al 2000 unpub       |
| 233w | AF288987 | A | Hymenoptera | Pteromalidae      | <i>Spalangia</i>     | <i>cameroni</i>      | New York 1990  | Giladi et al 2000 unpub       |
| 234w | AF288988 | A | Hymenoptera | Pteromalidae      | <i>Spalangia</i>     | <i>cameroni</i>      | Florida, USA   | Giladi et al 2000 unpub       |
| 235w | AF124858 | A | Hymenoptera | Eucoilidae        | <i>Leptopilina</i>   | <i>heterotoma</i>    |                | Vavre et al 1999              |
| 236w | AF071911 | A | Lepidoptera | Pyralidae         | <i>Ephestia</i>      | <i>kuehniella</i>    |                | Van Meer 1999                 |
| 237w | AF071912 | B | Hymenoptera | Trichogrammatidae | <i>Trichogramma</i>  | <i>kayaki</i>        | Riverside, CA  | Van Meer et al 1999           |
| 238w | AY177734 |   | Hymenoptera | Trichogrammatidae | <i>Trichogramma</i>  | <i>evanescens</i>    | China ?        | Wang & Shen 2002 unpub        |
| 239w | AY620207 | A | Diptera     | Drosophilidae     | <i>Drosophila</i>    | <i>fumipenis</i>     | Trinidad       | Miller & Reigler 2006         |
| 240w | DQ380869 | A | Hymenoptera | Pteromalidae      | <i>Spalangia</i>     | <i>cameroni</i>      | Ottawa, Canada | Kyei-Poku et al 2008          |
| 241w | DQ380871 | A | Hymenoptera | Pteromalidae      | <i>Spalangia</i>     | <i>cameroni</i>      | Denmark        | Kyei-Poku et al 2008          |
| 242w | DQ380872 | A | Hymenoptera | Pteromalidae      | <i>Spalangia</i>     | <i>cameroni</i>      | France         | Kyei-Poku et al 2008          |
| 243w | DQ380875 | A | Hymenoptera | Pteromalidae      | <i>Spalangia</i>     | <i>cameroni</i>      | Peru           | Kyei-Poku et al 2008          |
| 244w | DQ380878 | A | Hymenoptera | Pteromalidae      | <i>Spalangia</i>     | <i>nigra</i>         | Ottawa, Canada | Kyei-Poku et al 2008          |
| 245w | DQ380887 | A | Hymenoptera | Pteromalidae      | <i>Spalangia</i>     | <i>cameroni</i>      | Florida, USA   | Kyei-Poku et al 2008          |
| 246w | DQ412091 | A | Diptera     | Drosophilidae     | <i>Drosophila</i>    | <i>baimaii</i>       |                | Mateos et al 2006             |
| 247w | DQ412092 | A | Diptera     | Drosophilidae     | <i>Drosophila</i>    | <i>bicornuta</i>     |                | Mateos et al 2006             |
| 248w | AY622512 | A | Hymenoptera | Pteromalidae      | <i>Nasonia</i>       | <i>giraulti</i>      |                | Bordenstein & Wernegreen 2004 |
| 249w | AF288982 | A | Hymenoptera | Pteromalidae      | <i>Spalangia</i>     | <i>cameroni</i>      | Isreal         | Giladi et al 2000             |
| 250w | AF288983 | A | Hymenoptera | Pteromalidae      | <i>Spalangia</i>     | <i>cameroni</i>      | Isreal         | Giladi et al 2000             |
| 251w | AF288990 | A | Hymenoptera | Pteromalidae      | <i>Spalangia</i>     | <i>cameroni</i>      | Kazakhstan     | Giladi et al 2000             |
| 252w | AF539861 | B | Coleoptera  | Chrysomelidae     | <i>Aphthona</i>      | <i>nigriscutis</i>   | Usa            | Roehrdanz et al 2006          |
| 253w | AF521161 | A | Hymenoptera | Agaonidae         | <i>Pegoscapus</i>    | <i>longiceps</i>     | Panama         | Shoemaker et al               |
| 254w | AB109592 | A | Heteroptera | Cydnidae          | <i>Chilocoris</i>    | <i>piceus</i>        | Japan          | Kikuchi & Fukatsu 2003        |
| 255w | AB109594 | A | Heteroptera | Pentatomidae      | <i>Scotinophara</i>  | <i>lurida</i>        | Japan          | Kikuchi & Fukatsu 2003        |
| 256w | AB109598 | A | Heteroptera | Cydnidae          | <i>Adomerus</i>      | <i>triguttulus</i>   | Japan          | Kikuchi & Fukatsu 2003        |
| 257w | AB109612 | B | Heteroptera | Miridae           | <i>Charagochilus</i> | <i>angusticollis</i> | Japan          | Kikuchi & Fukatsu 2003        |

|      |          |   |             |               |                       |                            |                    |                        |
|------|----------|---|-------------|---------------|-----------------------|----------------------------|--------------------|------------------------|
| 258w | AB094392 | A | Lepidoptera | Nymphalidae   | <i>Nymphalis</i>      | <i>xanthomelas</i>         | Japan              | Tagami & Miura 2004    |
| 259w | AF020071 | A | Hymenoptera | Pteromalidae  | <i>Muscidifurax</i>   | <i>uniraptor</i>           | Nebraska           | Zhou et al 1998        |
| 260w | DQ380857 | A | Hymenoptera | Pteromalidae  | <i>Muscidifurax</i>   | <i>uniraptor</i>           | Nebraska           | Kyei-Poku etal 2008    |
| 261w | DQ380863 | A | Hymenoptera | Pteromalidae  | <i>Nasonia</i>        | <i>vitripennis</i>         | Argentina          | Kyei-Poku etal 2008    |
| 262w | DQ380864 | A | Hymenoptera | Pteromalidae  | <i>Nasonia</i>        | <i>vitripennis</i>         | Raymond, Canada    | Kyei-Poku etal 2008    |
| 263w | DQ380865 | A | Hymenoptera | Pteromalidae  | <i>Nasonia</i>        | <i>vitripennis</i>         | Ottawa, Canada     | Kyei-Poku etal 2008    |
| 264w | DQ380866 | A | Hymenoptera | Pteromalidae  | <i>Nasonia</i>        | <i>vitripennis</i>         | Lethbridge, Canada | Kyei-Poku etal 2008    |
| 265w | DQ380885 | A | Hymenoptera | Pteromalidae  | <i>Urolepis</i>       | <i>rufipes</i>             | Edmonton, Canada   | Kyei-Poku etal 2008    |
| 266w | DQ380886 | A | Hymenoptera | Pteromalidae  | <i>Urolepis</i>       | <i>rufipes</i>             | Ottawa, Canada     | Kyei-Poku etal 2008    |
| 267w | AB038321 | A | Coleoptera  | Bruchidae     | <i>Callosobruchus</i> | <i>chinensis</i>           | New Zealand        | Kondo etal 2002        |
| 268w | JX134919 | B | Diptera     | Drosophilidae | <i>Drosophila</i>     | <i>dasyncnemias</i>        | Hawaii             | This study             |
| 269w | JX134915 | B | Diptera     | Drosophilidae | <i>Drosophila</i>     | <i>dasyncnemias</i>        | Hawaii             | This study             |
| 270w | JX134950 | B | Hemiptera   | Cicadellidae  | <i>Nesophrosyne</i>   | <i>giffardi interrupta</i> | Hawaii             | This study             |
| 271w | AB109569 | B | Heteroptera | Nabidae       | <i>Nabis</i>          | <i>kinbergii</i>           | Japan              | Kikuchi & Fukatsu 2003 |
| 272w | AB109574 | B | Heteroptera | Coreidae      | <i>Notobitus</i>      | <i>meleagris</i>           | Japan              | Kikuchi & Fukatsu 2003 |
| 273w | AB094364 | B | Heteroptera | Anthocoridae  | <i>Orius</i>          | <i>minutus</i>             | Japan              | Miura unpub 2002       |
| 274w | AB094366 | B | Heteroptera | Anthocoridae  | <i>Orius</i>          | <i>strigicollis</i>        | Japan              | Miura unpub 2002       |
| 275w | AB094368 | B | Heteroptera | Anthocoridae  | <i>Orius</i>          | <i>nagii</i>               | Japan              | Miura unpub 2002       |
| 276w | JX134926 | B | Diptera     | Drosophilidae | <i>Drosophila</i>     | <i>apicipuncta</i>         | Hawaii             | This study             |
| 277w | JX134922 | B | Diptera     | Drosophilidae | <i>Drosophila</i>     | <i>kikawa</i>              | Hawaii             | This study             |
| 278w | DQ516380 | B | Hymenoptera | Pteromalidae  | <i>Nasonia</i>        | <i>vitripennis</i>         | Lethbridge, Canada | Kyei-Poku 2006         |
| 279w | DQ516381 | B | Hymenoptera | Pteromalidae  | <i>Spalangia</i>      | <i>cameroni</i>            | Florida, USA       | Kyei-Poku 2006         |
| 280w | EU723840 | B | Araneae     | Linyphiidae   | <i>Hylyphantes</i>    | <i>graminicola</i>         | Hainana, China     | Yun etal 2011          |
| 281w | JX134930 | B | Diptera     | Drosophilidae | <i>Drosophila</i>     | <i>tetraspilota</i>        | Hawaii             | This study             |
| 282w | JX134946 | B | Hemiptera   | Cicadellidae  | <i>Nesophrosyne</i>   | <i>silvicola</i>           | Hawaii             | This study             |
| 283w | JX134945 | B | Hemiptera   | Cicadellidae  | <i>Nesophrosyne</i>   | <i>n.sp.9</i>              | Hawaii             | This study             |
| 284w | JX134946 | B | Hemiptera   | Cicadellidae  | <i>Nesophrosyne</i>   | <i>giffardi</i>            | Hawaii             | This study             |
| 285w | JX134947 | B | Hemiptera   | Cicadellidae  | <i>Nesophrosyne</i>   | <i>giffardi</i>            | Hawaii             | This study             |
| 286w | JX134948 | B | Hemiptera   | Cicadellidae  | <i>Nesophrosyne</i>   | <i>giffardi</i>            | Hawaii             | This study             |
